# Supplementary material
Source: Research Square preprint supplement (doi:10.21203/rs.3.rs-9200250/v1)
Supplement: Supplementary file 1 [file c8ac452d3c35167ca5932981.docx]

**OFFICIAL SURVEY QUESTIONNAIRE**

**Survey Introduction**

Dear Participant,

We are a group of researchers, including Thi Thanh Hang Hoang, Van Dat Tran, and Hoang Uyen Nhi Doan. We are currently conducting a research study entitled ***“Virtual Reality’s impact on Virtual World Brand Experience, Virtual World Brand Authenticity, and Purchase Intention: The Moderating Role of Technology Anxiety.”***

First of all, we sincerely thank you for taking the time to participate in this survey. Your participation is highly appreciated and will make a valuable contribution to our research.

Please be assured that this survey is completely anonymous, and all responses will be used solely for academic research purposes. There are no right or wrong answers; we are only interested in your honest opinions and experiences.

Your responses are extremely important to us, and we sincerely hope to receive your kind support by completing this questionnaire.

Thank you very much for your time and cooperation.

**Part A. Demographic Information**

*Please kindly answer the following questions by selecting the option that best describes you. All information provided will be kept confidential and used solely for academic research purposes.*

1. **Please indicate your gender.**

☐ Male

☐ Female

1. **Please indicate your age group.**

☐ 16–22 years old

☐ 23–30 years old

☐ 31–40 years old

☐ Over 40 years old

1. **Please indicate your current location.**

☐ Ho Chi Minh City

☐ Hanoi

☐ Hue

☐ Da Nang

☐ Can Tho

☐ Other (Please specify): ________________

1. **Please indicate your current occupation.**

☐ Student

☐ Officer / Employee

☐ Other (please specify): ______________________

1. **What industry are you currently working in?**

☐ Information Technology / Software

☐ E-commerce

☐ Marketing / Brand Management

☐ Graphic Design / User Experience (UX)

☐ Other (Please specify): ________________

1. **Please indicate your average monthly income.**

☐ Below 7 million VND

☐ From 7 million to under 15 million VND

☐ From 15 million to under 25 million VND

☐ 25 million VND or above

1. **On average, how much time do you spend experiencing virtual reality (VR) per session?**

☐ Less than 2 hours

☐ From 2 to 4 hours

☐ More than 4 hours

1. **How frequently do you engage in virtual brand experiences or virtual shopping environments?**

☐ Never

☐ Occasionally

☐ Sometimes, a few times a month

☐ Frequently, every week or more

**Part B. Survey Statements**

Please indicate the extent to which you agree or disagree with the following statements. For each statement, please select one option only based on your personal experience.

The scale ranges from 1 to 5, where:

- 1 – Strongly disagree
- 2 – Disagree
- 3 – Neutral
- 4 – Agree
- 5 – Strongly agree

*(You will now be presented with a series of statements related to your experience with virtual reality (VR).)*

| ***No.*** | ***Statement*** | ***1*** | ***2*** | ***3*** | ***4*** | ***5*** |
| --- | --- | --- | --- | --- | --- | --- |
| ***Pract*** | | | | | | |
| ***1*** | ***Pract 1*** | *☐* | *☐* | *☐* | *☐* | *☐* |
| ***Telepresence*** | | | | | | |
| *2* | The shopping in VR store seemed to me somewhere I visited rather than something I saw. | *☐* | *☐* | *☐* | *☐* | *☐* |
| *3* | I forgot about my immediate surroundings when I was navigating through the VR store. | *☐* | *☐* | *☐* | *☐* | *☐* |
| *4* | When the shopping in VR store ended, I felt like I came back to the real world after a journey. | *☐* | *☐* | *☐* | *☐* | *☐* |
| ***Perceived Diagnosticity*** | | | | | | |
| *5* | It’s beneficial for me to use this VR store to assess the product | *☐* | *☐* | *☐* | *☐* | *☐* |
| *6* | This VR store benefits me from familiarizing me with the product. | *☐* | *☐* | *☐* | *☐* | *☐* |
| *7* | Its beneficial for me to use this VR store to know more about product | *☐* | *☐* | *☐* | *☐* | *☐* |
| ***Playfulness*** | | | | | | |
| *8* | Shopping from this VR store makes me feel like I a min another world | *☐* | *☐* | *☐* | *☐* | *☐* |
| *9* | I enjoy shopping from this VR store for the sake of it, not just for the items I may have purchased | *☐* | *☐* | *☐* | *☐* | *☐* |
| *10* | Using this VR store is really fun | *☐* | *☐* | *☐* | *☐* | *☐* |
| *11* | It is fun to discover the its function and its elements | *☐* | *☐* | *☐* | *☐* | *☐* |
| ***Virtual World Brand Experience*** | | | | | | |
| *12* | Using the VR activity provided me with authentic experiences. | *☐* | *☐* | *☐* | *☐* | *☐* |
| *13* | Using the VR provided me with genuine experiences. | *☐* | *☐* | *☐* | *☐* | *☐* |
| *14* | Using the VR activity provided me with exceptional experiences. | *☐* | *☐* | *☐* | *☐* | *☐* |
| ***Virtual World Brand Authenticity*** | | | | | | |
| *15* | *I had a memorable experience interacting with the brand in the VR environment.* | *☐* | *☐* | *☐* | *☐* | *☐* |
| *16* | *The VR experience with the brand was enjoyable and engaging.* | *☐* | *☐* | *☐* | *☐* | *☐* |
| *17* | *The VR environment provided a rich and immersive experience of the brand.* | *☐* | *☐* | *☐* | *☐* | *☐* |
| ***Purchase Intention*** | | | | | | |
| *18* | *I would be interested in purchasing products from this brand in the virtual world.* | *☐* | *☐* | *☐* | *☐* | *☐* |
| *19* | *If I wanted to, I could easily purchase products from this brand in the virtual world.* | *☐* | *☐* | *☐* | *☐* | *☐* |
| *20* | *If I wanted to, I could easily purchase products from this brand in the virtual world.* | *☐* | *☐* | *☐* | *☐* | *☐* |
| ***Technology Anxiety*** | | | | | | |
| *21* | *I feel apprehensive about using VR apps.* | *☐* | *☐* | *☐* | *☐* | *☐* |
| *22* | *It scares me to think that I could lose a lot of information using VR apps by hitting the wrong key.* | *☐* | *☐* | *☐* | *☐* | *☐* |
| *23* | *I hesitate to use VR apps for fear of making mistakes I cannot correct.* | *☐* | *☐* | *☐* | *☐* | *☐* |
| *24* | *I have avoided technology because it is unfamiliar to me.* | *☐* | *☐* | *☐* | *☐* | *☐* |
